# Supplementary material for: Quaking promotes monocyte differentiation into pro-atherogenic macrophages by controlling pre-mRNA splicing and gene expression
Source: PubMed Central journal article supplement (PMC4821877; doi:10.1038/ncomms10846), 2016-03-31
Supplement: ncomms10846-s1.pdf [file ncomms10846-s1.pdf]

## Supplementary Information

### Supplementary Figure 1

#### Chimeric reads in chromosome 5

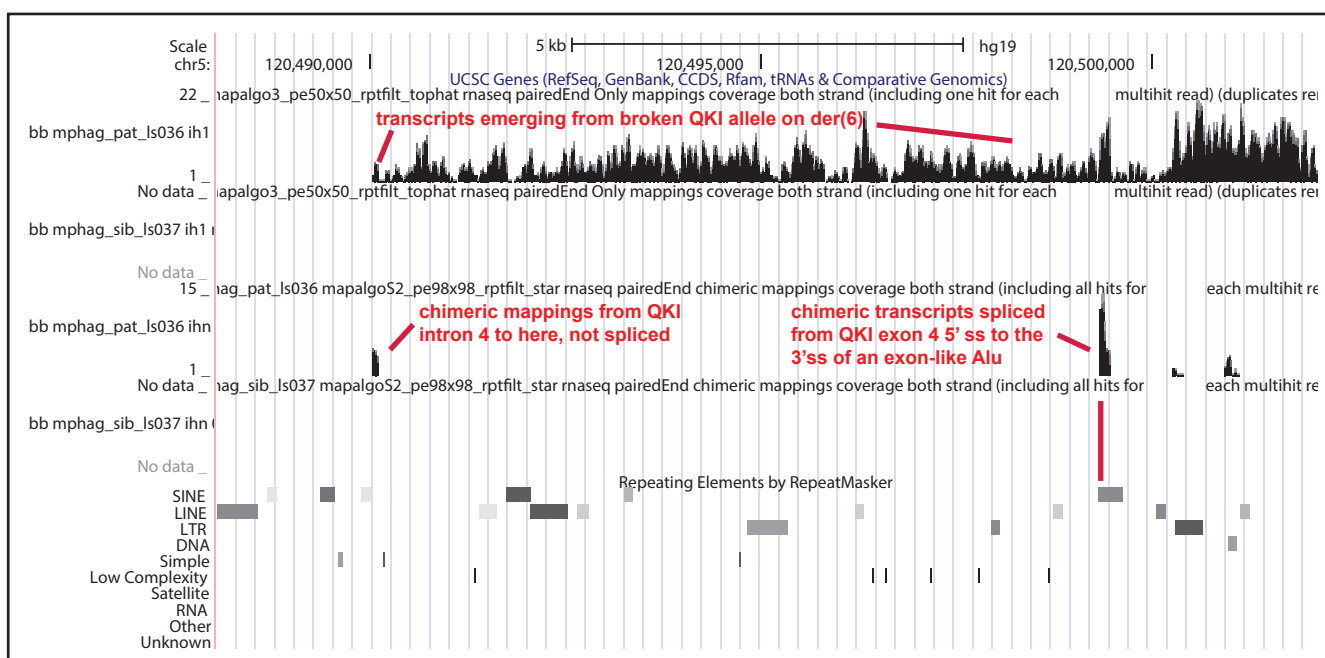

**Supplementary Figure 1: RNA-seq shows chr6-derived read coverage on chr5.** Genomic location according to UCSC genome browser on chromosome 5. Read coverage is only seen in patient tracks.

a

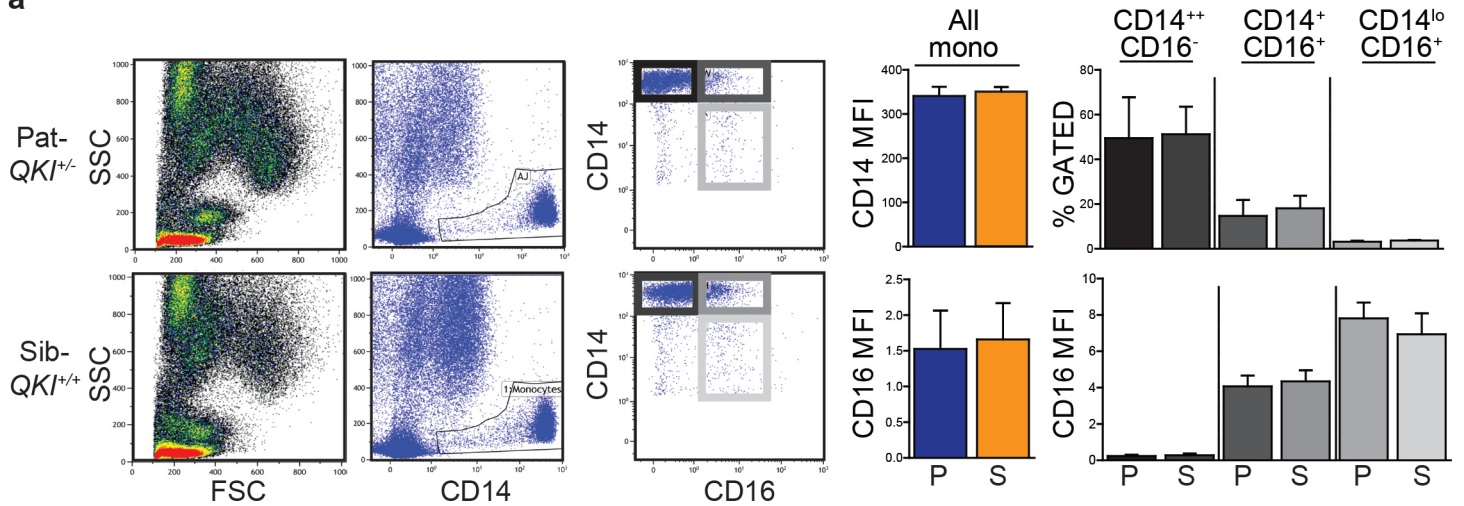

b

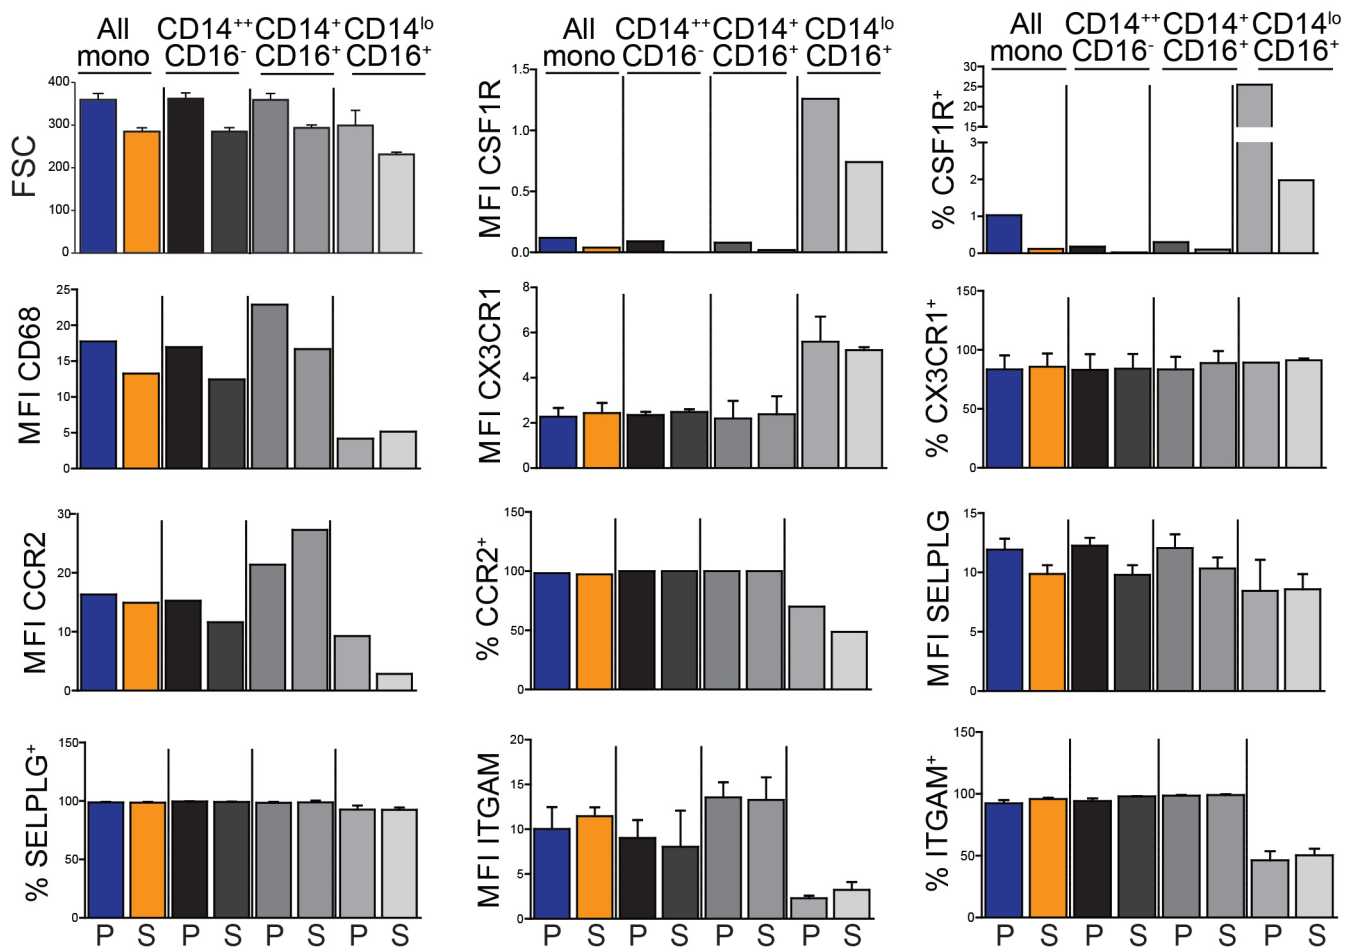

**Supplementary Figure 2: FACS analysis of surface marker expression levels in monocyte subsets in the QKI haploinsufficient patient and her sibling.**

**a.** FACS analysis of PB harvested from the QKI haploinsufficient patient (P denotes Pat-QKI<sup>+/-</sup>) as compared with an age- and sex-matched sibling control (S denotes Sib-QKI<sup>+/+</sup>). Live cells were first gated in the FSC/SSC gate, after which monocytes were selected based in CD14/SSC expression. Monocyte subpopulations were defined as CD14<sup>++</sup>/CD16<sup>-</sup>, CD14<sup>++</sup>/CD16<sup>+</sup>, and CD14<sup>lo</sup>/CD16<sup>+</sup>. MFI denotes mean fluorescent index. (n=1 biological replicate; n=7 technical replicates). **b.** Quantitation of average monocyte size in Pat-QKI<sup>+/-</sup> and Sib-QKI<sup>+/+</sup> monocytes based on FSC parameter. All other panels represent quantification of either MFI or percentage of gated monocytes (defined as % gene name<sup>+</sup>) that express the designated surface markers at levels higher than background signal, such as CSF1R. Data are based on biological n=1, while error bars indicate technical replicates for surface markers included in more than one sample in the phenotype characterization panel (minimal n=2).

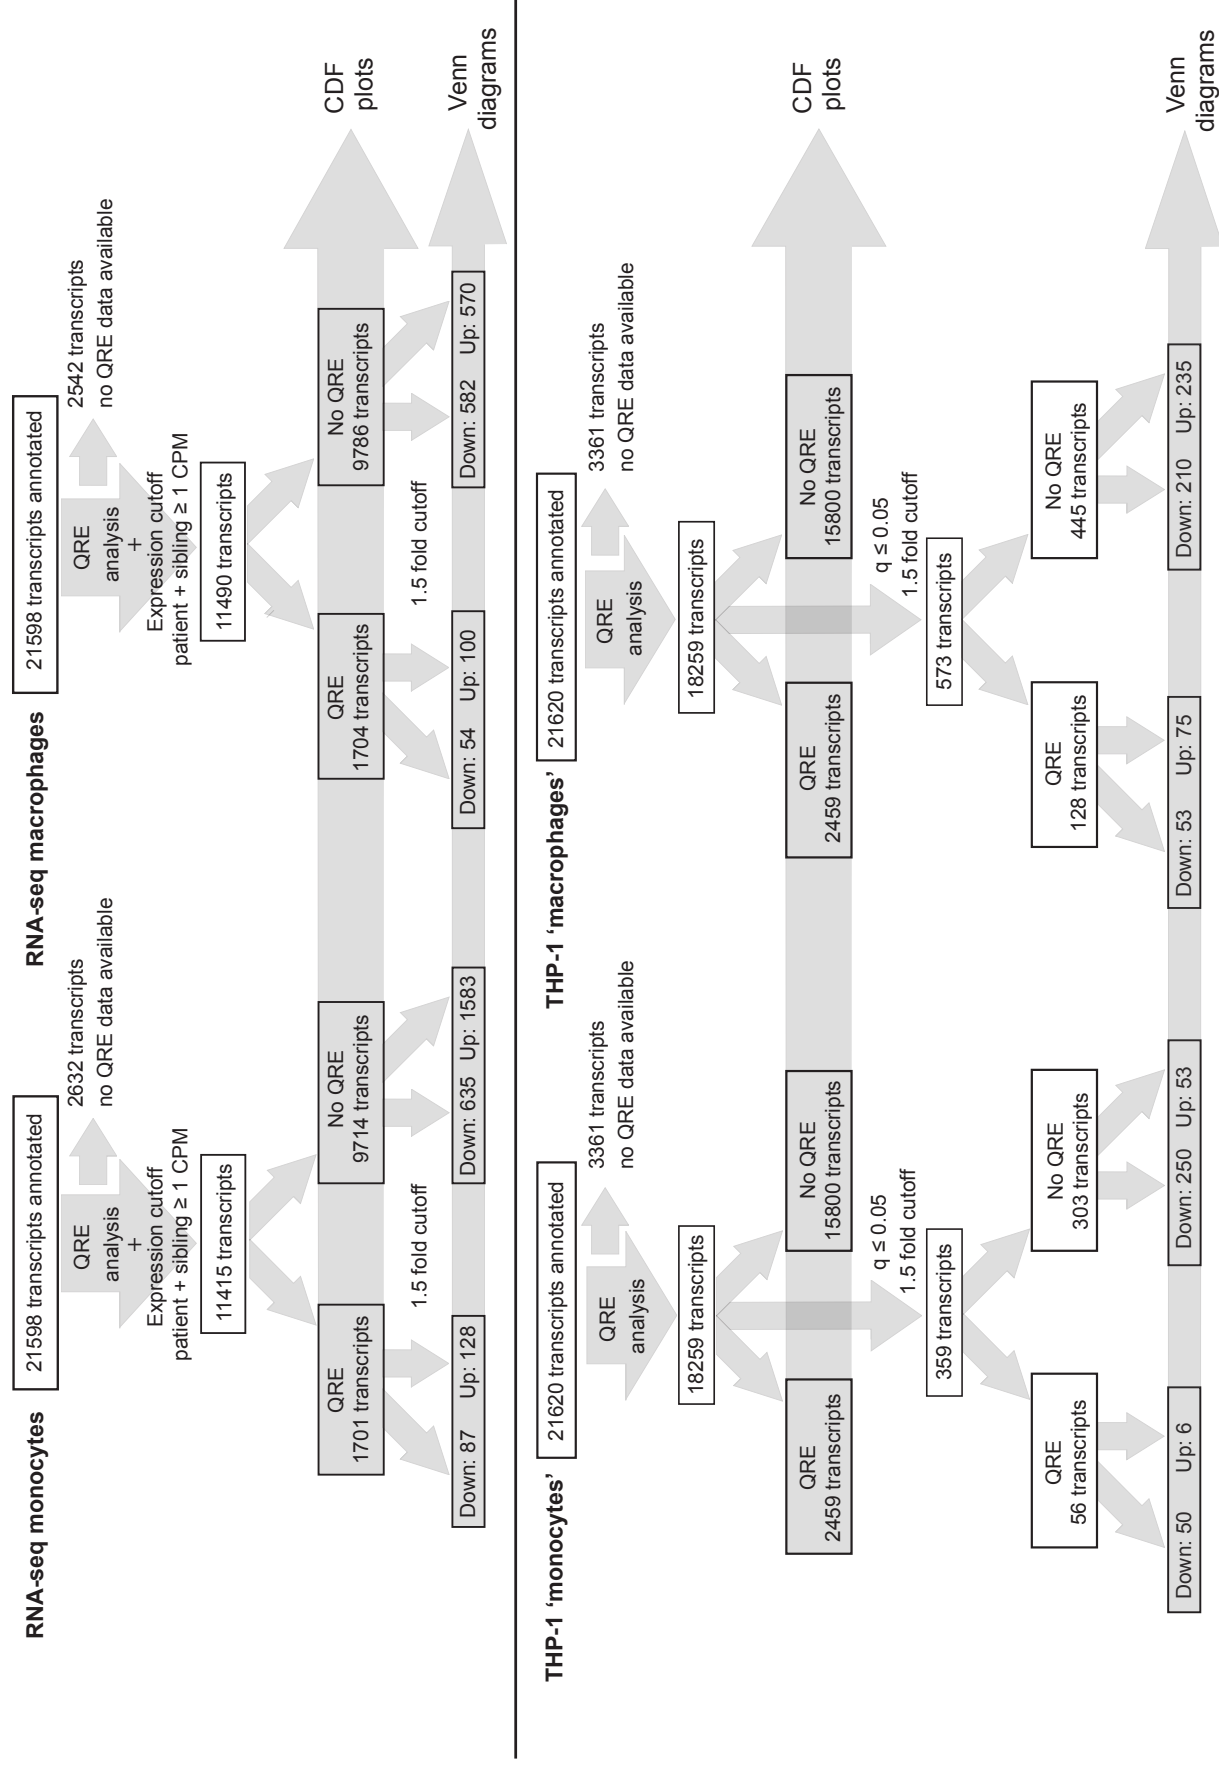

**Supplementary Figure 3: Schematic representation of transcript stratification.** Flow-diagram illustrating the bioinformatic approach utilized for analysis of RNA-seq data (top) and microarray-based data (bottom). Vertical arrows depict stratification based on the presence or absence of QRE's in transcripts and those achieving expression and/or significance cut-offs. Horizontal arrows indicate transcripts used to generate Venn diagrams (Fig. 3g, 5e), tables of most up and downregulated genes (Fig. 3h, 5f), scatterplots (Fig. 3i, 5g) and Cumulative Distribution Fraction plots (Fig. 3j, 5h).

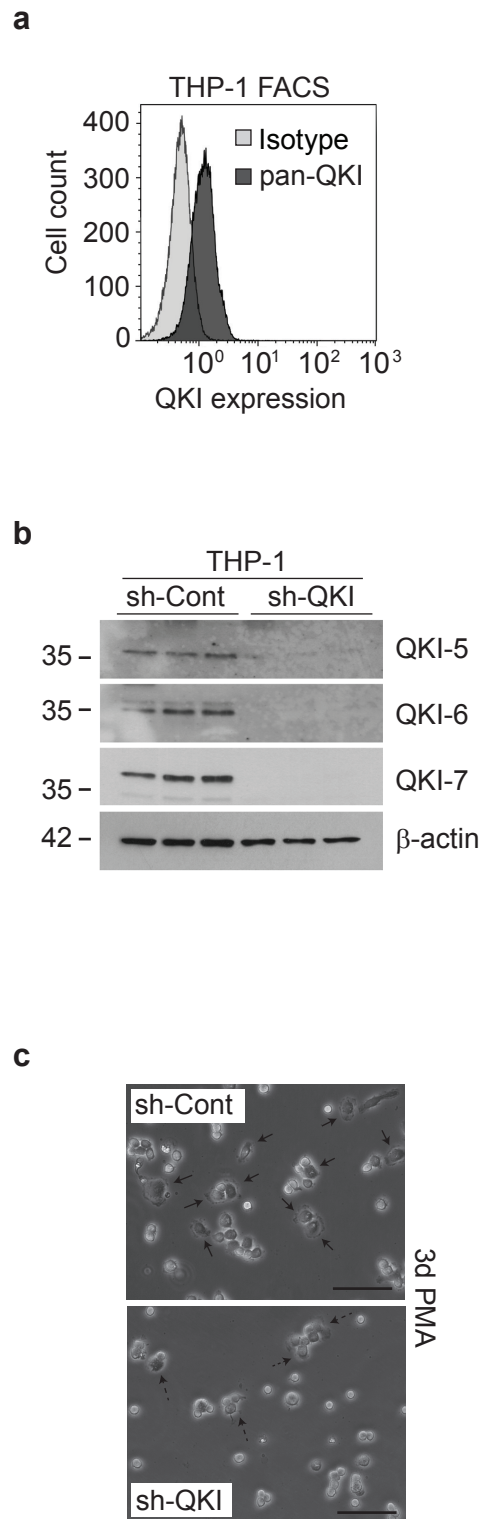

**Supplementary Figure 4: QKI protein is differentially expressed during THP-1 monocyte-like to macrophage-like differentiation.** **a.** Intracellular FACS analysis of THP-1 'monocytes' for total QKI expression. **b.** Western blot analysis of QKI-5, -6 and -7 expression in cellular lysates harvested from sh-Cont and sh-QKI transduced THP-1 'macrophages' following stimulation with PMA for 3d. **c.** Phase-contrast photomicrographs of 3 days stimulated THP-1 'macrophages'. Scale bar = 50  $\mu$ m.

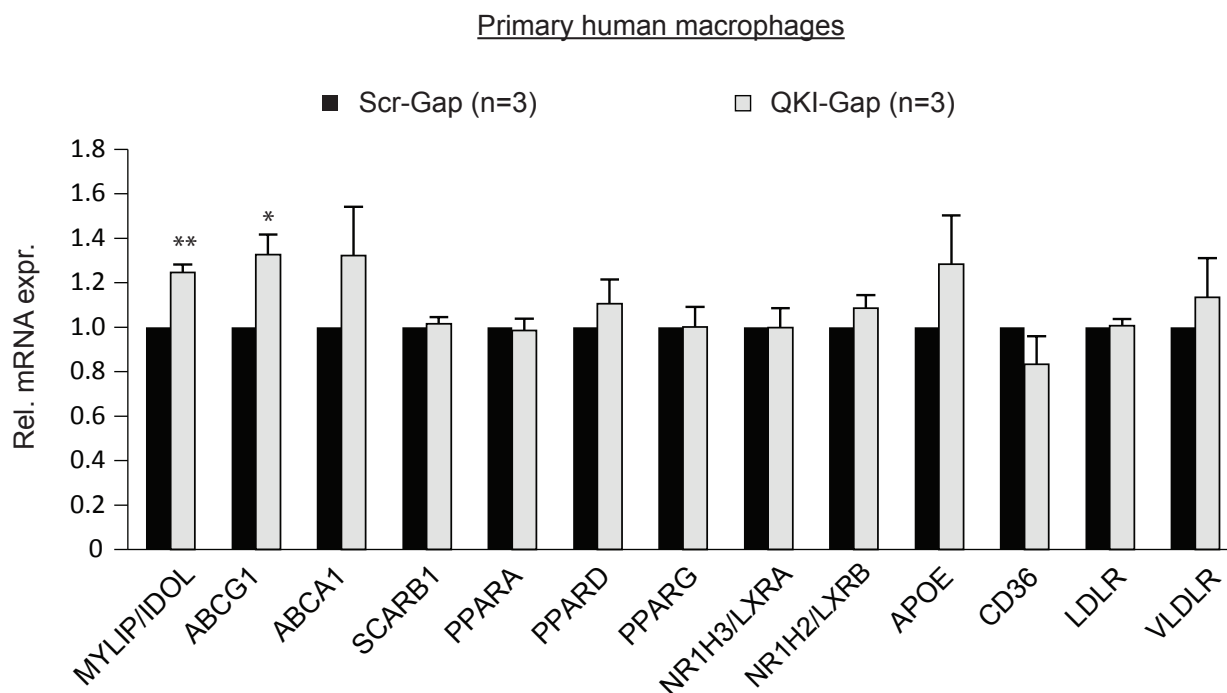

**Supplementary Figure 5: GapmeR-mediated reduction of QKI expression regulates the expression of atherosclerosis-related mRNAs.** qRT-PCR analysis of established atherosclerosis-related genes in QKI-Gap as compared to Scr-Gap treated macrophages. Gene expression in QKI-Gap macrophages are relative to Scr-Gap macrophages (n=3). Data expressed as mean +/- s.e.m; Student's t-test; \*p<0.05, \*\* p<0.01.

Transcription factors that bind to the QKI promoter region

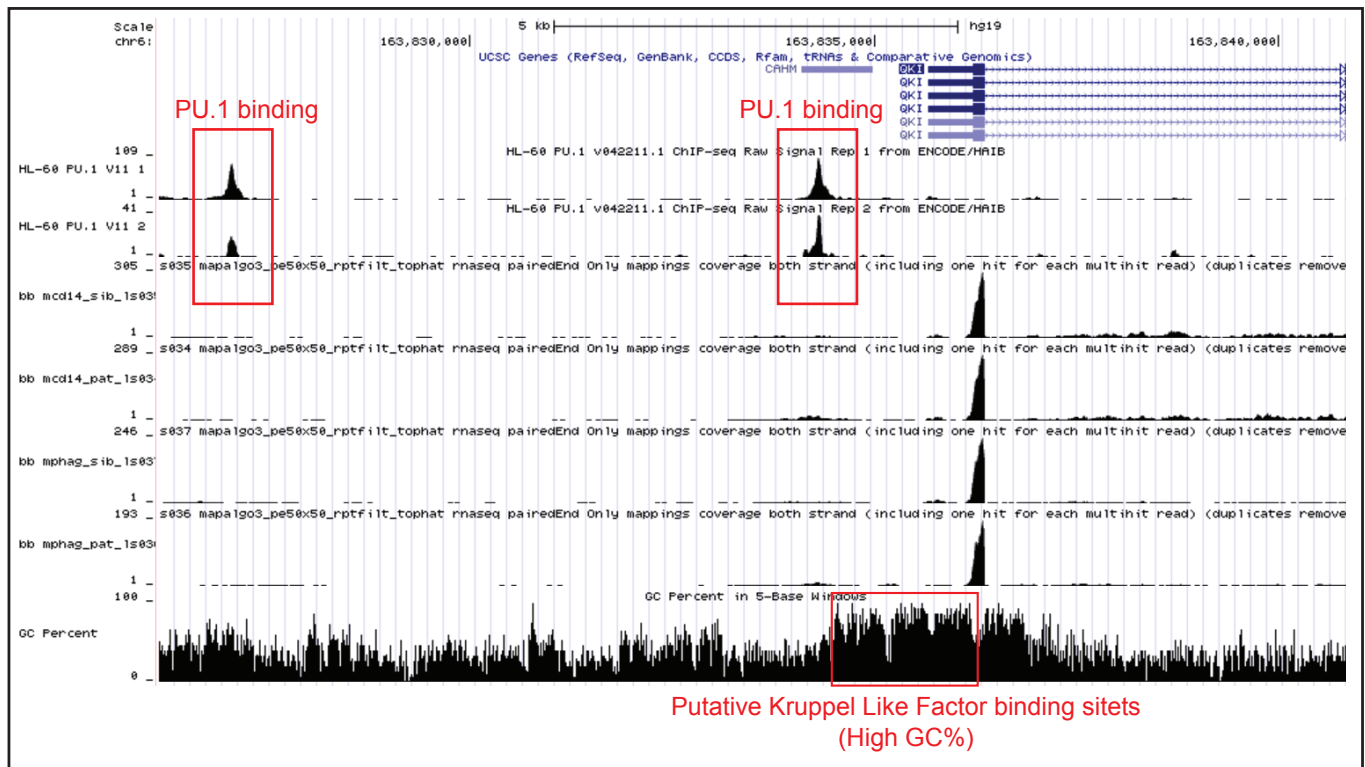

**Supplementary Figure 6: Experimentally determined and putative transcription factor binding sites in the QKI promoter region.** Top tracks: Genomic location and organization according to UCSC genome browser on chromosome 6 mapping to the QKI locus. Tracks 2 and 3 represent the read coverage for two independent chromatin-immunoprecipitations in HL60 cells for PU.1<sup>1</sup>, a well-known myeloid transcription factor. Tracks 4,5,6,7 represent read coverage for sibling and patient monocyte and macrophages. Track 8 represents percentage GC in 5 bp windows, indicative of putative Kruppel-Like Factor binding sites.

Supplementary Figure 7

Figure 1e

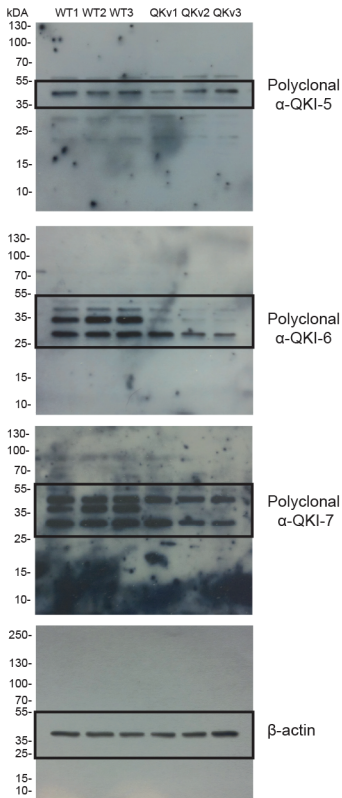

Figure 2d

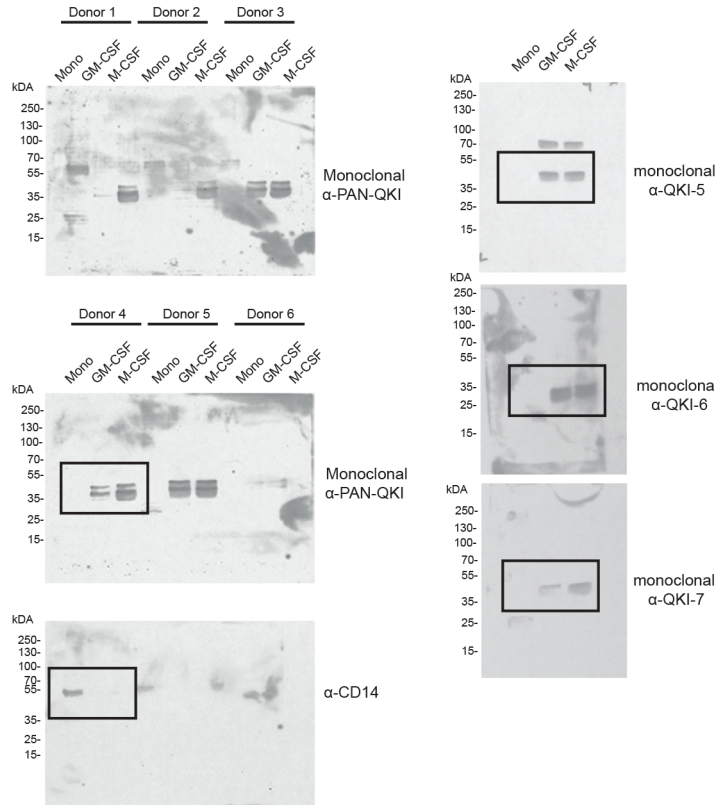

Figure 3e

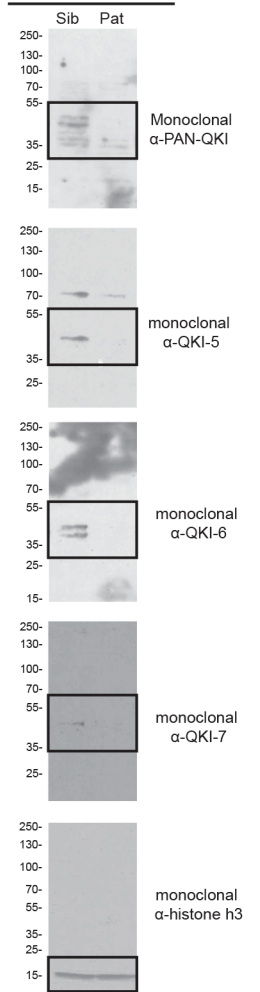

Figure 5b

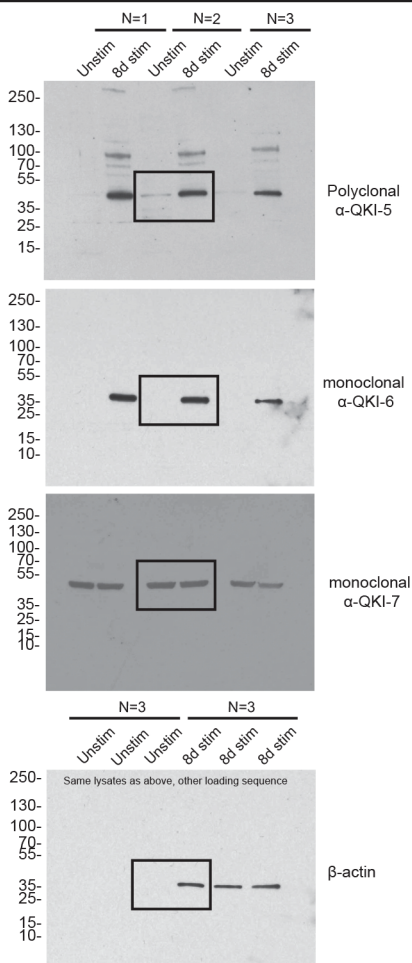

Supplementary figure 4b

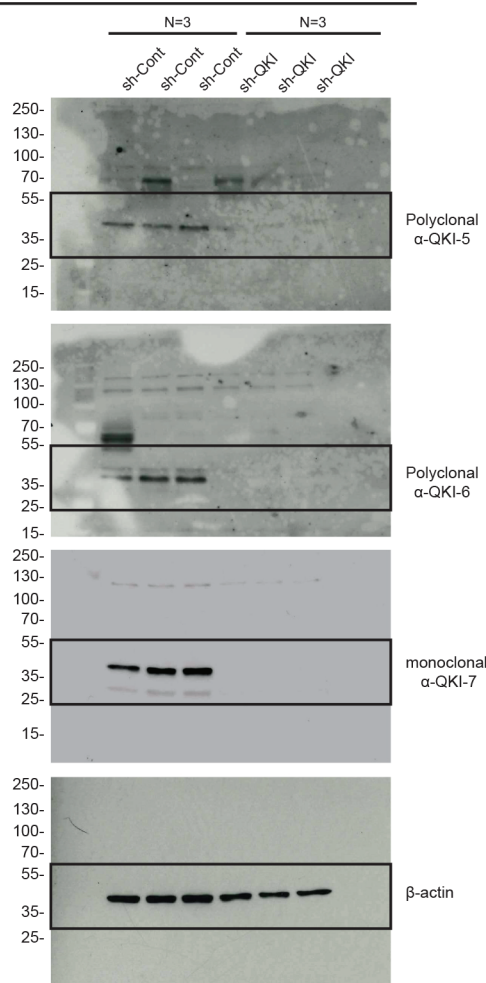

Supplementary Figure 7: Original immunoblot images utilized for preparation of figures 1e, 2d, 3e, 5b and Supplementary Fig. 4b.

Supplementary Figure 8

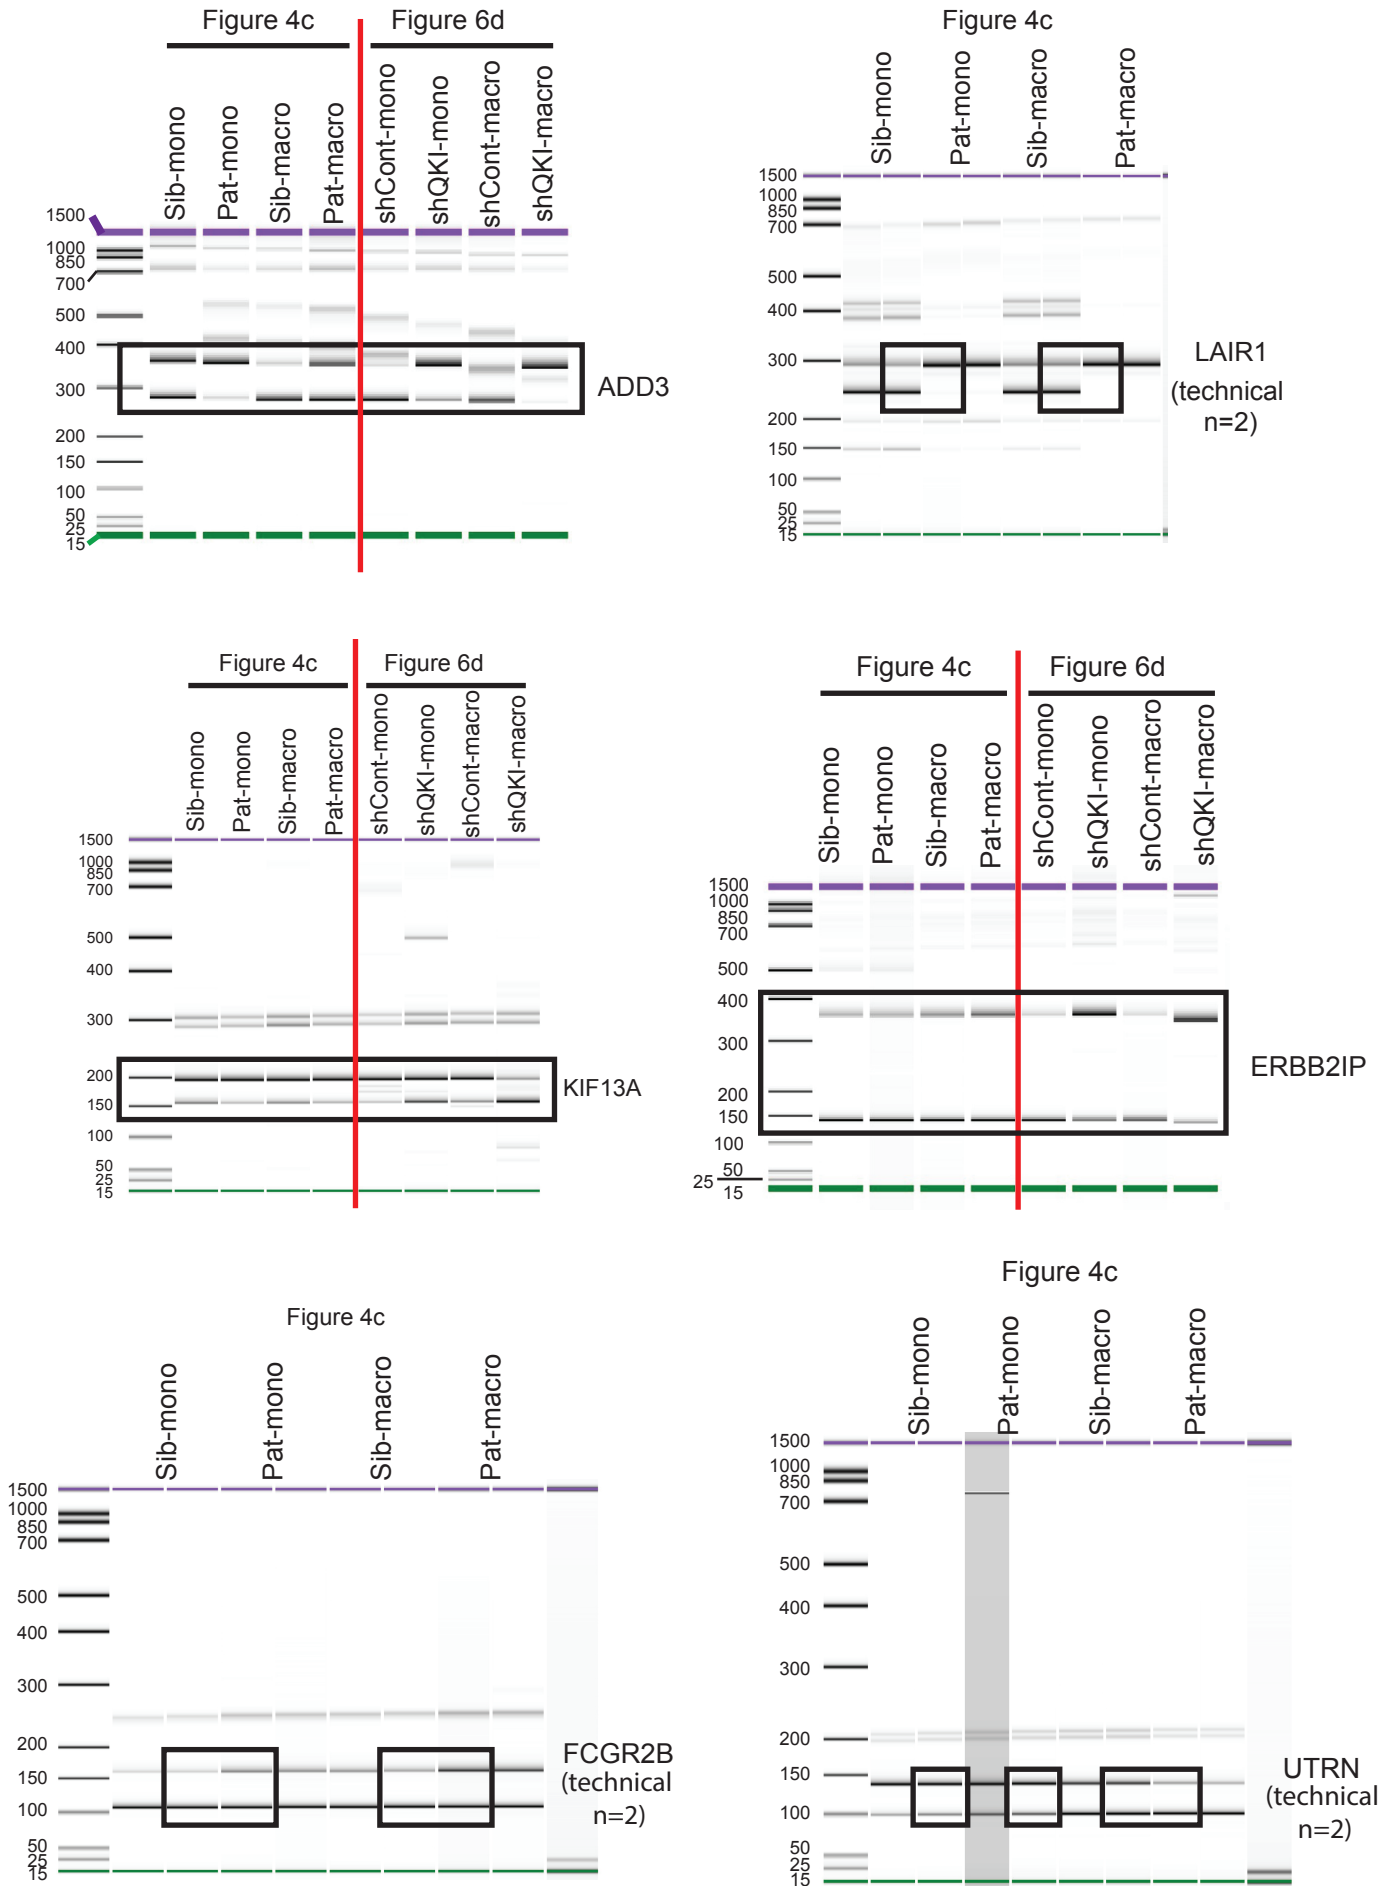

**Supplementary Figure 8:** Original bioanalyzer images utilized for preparation of figures 4c and 6d.



Figure 6d

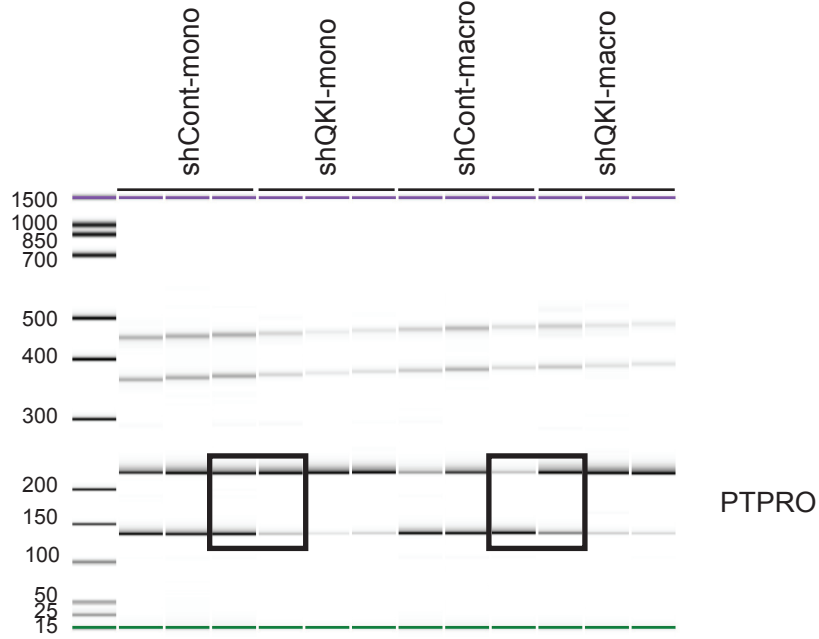

Figure 6e

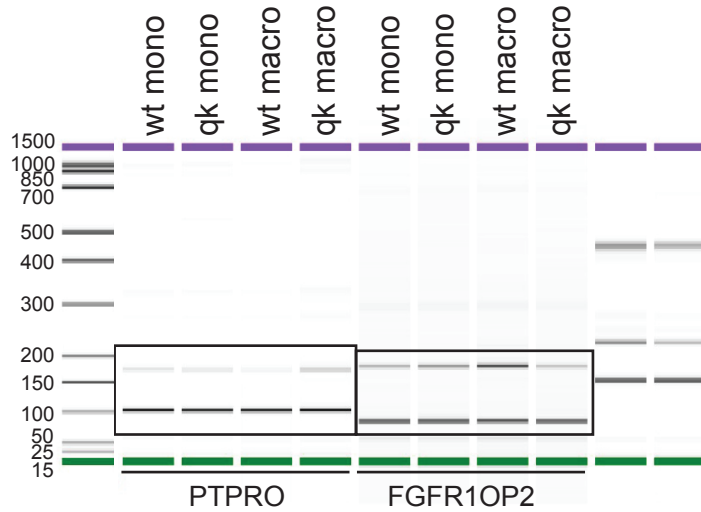

Figure 6e

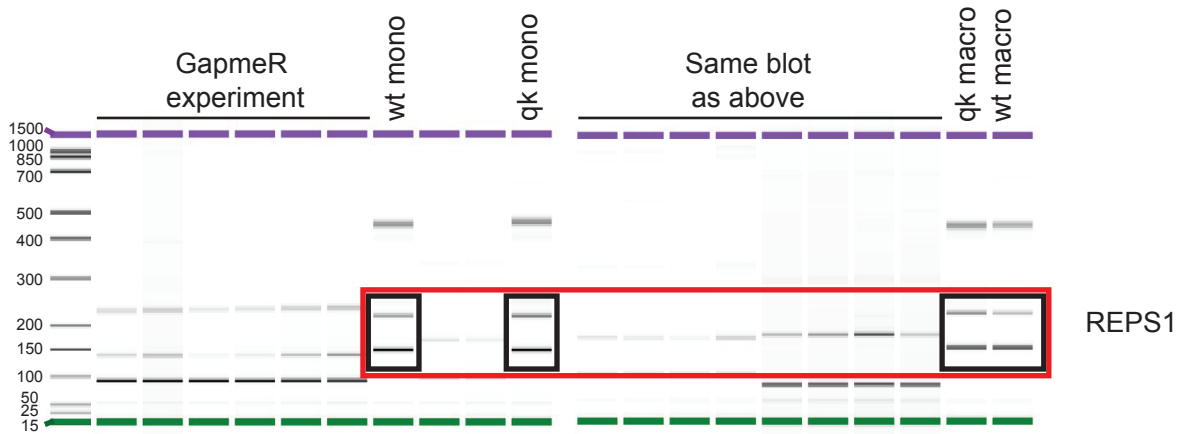

Note: A pipeting miscue in left gel prompted us to load the two remaining samples in another blot.

Supplementary Figure 10

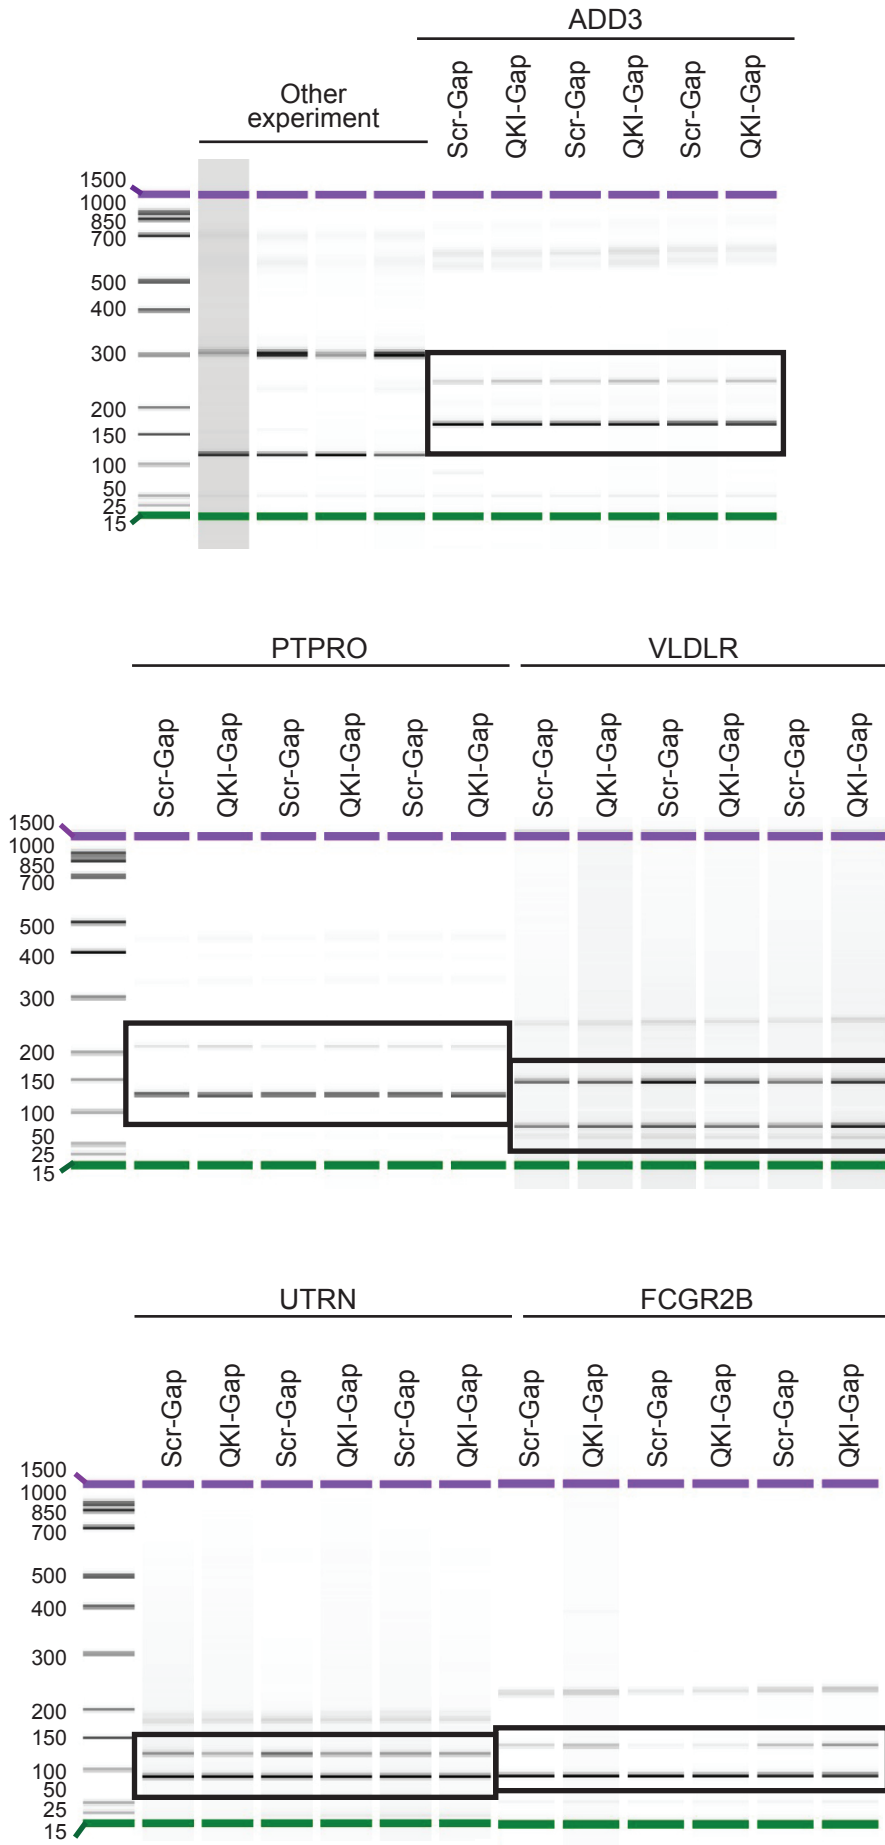

Supplementary Figure 10: Original bioanalyzer images utilized for preparation of figures 4f.

Supplementary Table 1

| Transcript abundance primers |         | 5'--> 3'                | Atherosclerosis-related genes |         | 5'--> 3'                |
|------------------------------|---------|-------------------------|-------------------------------|---------|-------------------------|
| hsa+mmu-QKI-5                | Forward | CTGTCATGCCAAACGGAAC     | hsa-MYLIP/IDOL                | Forward | CATCTTACAGGAGCAGACTAGGC |
|                              | Reverse | GATGGACACGCATATCGTG     |                               | Reverse | TTGGCAGTGTCTGGTTGTAG    |
| hsa+mmu-QKI-6                | Forward | CTGTCATGCCAAACGGAAC     | hsa-ABCG1                     | Forward | ATTCAGGGACCTTTCCTATTCGG |
|                              | Reverse | CGTTGGGAAAGCCATAC       |                               | Reverse | CTCACCACCTATTGAACCTCCCG |
| hsa+mmu-QKI-7                | Forward | CTGTCATGCCAAACGGAAC     | hsa-ABCA1                     | Forward | ACCCACCTATGAACAACATGA   |
|                              | Reverse | GACTGGCATTTCATCCAC      |                               | Reverse | GAGTCGGGTAACGGAAACAGG   |
| hsa-GAPDH                    | Forward | TTCCAGGAGCGAGATCCCT     | hsa-SCARB1                    | Forward | ACTTCTGGCATTCCGATCAGT   |
|                              | Reverse | CACCCATGACGAACATGGG     |                               | Reverse | ACGAAGCGATAGGTGGGGAT    |
|                              |         |                         | hsa-PPARD                     | Forward | GCCTCTATCGTCAACAAGGAC   |
|                              |         |                         |                               | Reverse | GCAATGAATAGGGCCAGGTC    |
|                              |         |                         | hsa-PPARG                     | Forward | TACTGTCCGGTTTCAGAAATGCC |
|                              |         |                         |                               | Reverse | GTCAGCGGACTCTGGATTCCAG  |
|                              |         |                         | hsa-PPARA                     | Forward | ATGGTGGACACGAAAGCC      |
|                              |         |                         |                               | Reverse | CGATGGATTGCGAAATCTCTTGG |
|                              |         |                         | hsa-NR1H2                     | Forward | AGAAGATTCGGAACAACAGCA   |
|                              |         |                         |                               | Reverse | GCTGGATCATTAGTTCTTGAGCC |
|                              |         |                         | hsa-ApoE                      | Forward | GTTGCTGGTCACATTCCTGG    |
|                              |         |                         |                               | Reverse | GCAGGTAATCCAAAAGCGAC    |
|                              |         |                         | hsa-CD36                      | Forward | CTTTGGCTTAATGAGACTGGGAC |
|                              |         |                         |                               | Reverse | GCAACAAACATCACCACACCA   |
|                              |         |                         | hsa-LDLR                      | Forward | ACGGCGTCTTCTCTATGACA    |
|                              |         |                         |                               | Reverse | CCCTGGTATCCGCAACAGA     |
|                              |         |                         | hsa-VLDLR                     | Forward | CTGGGTATGCGACGATGATG    |
|                              |         |                         |                               | Reverse | CTTGGTGTGTATGACTGGCTG   |
|                              |         |                         | hsa-NR1H3                     | Forward | CTCAATGCCTGATGTTTCTCCT  |
|                              |         |                         |                               | Reverse | TCCAACCCTATCCCTAAAGCAA  |
|                              |         |                         | mmu-PPARD                     | Forward | TCCATCGTCAACAAGACGGG    |
|                              |         |                         |                               | Reverse | ACTTGGGCTCAATGATGTCC    |
|                              |         |                         | mmu-PPARG                     | Forward | GGAAGACCACTGCATTCCTT    |
|                              |         |                         |                               | Reverse | GTAATCAGCAACCAATTGGGTCA |
|                              |         |                         | mmu-PPARA                     | Forward | AGAGCCCATCTGTCTCTC      |
|                              |         |                         |                               | Reverse | ACTGGTAGTCTGCAAAACAAA   |
|                              |         |                         | mmu-NR1H2                     | Forward | ATGTCTTCCCCACAAGTTCT    |
|                              |         |                         |                               | Reverse | GACCACGATGTAGGCAGAGC    |
|                              |         |                         | mmu-NR1H3                     | Forward | CTCAATGCCTGATGTTTCTCCT  |
|                              |         |                         |                               | Reverse | TCCAACCCTATCCCTAAAGCAA  |
|                              |         |                         | mmu-ApoE                      | Forward | CTGACAGGATGCCTAGCCG     |
|                              |         |                         |                               | Reverse | CGCAGGTAATCCAGAAGC      |
|                              |         |                         | mmu-CD36                      | Forward | AGATGACGTGGCAAGAACAG    |
|                              |         |                         |                               | Reverse | CCTTGGCTAGATAACGAACTCTG |
|                              |         |                         | mmu-LDLR                      | Forward | TCAGACGAACAAGGCTGTCC    |
|                              |         |                         |                               | Reverse | CCATCTAGGCAATCTCGGTCTC  |
|                              |         |                         | mmu-VLDLR                     | Forward | GAGTCTGACTTCGTGTGCAAA   |
|                              |         |                         |                               | Reverse | GAACCGTCTTCGCAATCAGGA   |
|                              |         |                         | mmu-NR1H3                     | Forward | CTCAATGCCTGATGTTTCTCCT  |
|                              |         |                         |                               | Reverse | TCCAACCCTATCCCTAAAGCAA  |
|                              |         |                         | mmu-MYLIP/IDOL                | Forward | ATGCTGTGCTATGTGACGAGG   |
|                              |         |                         |                               | Reverse | TCGATGATCCCTAGACGCCTG   |
| pre-mRNA splicing primers    |         | 5'--> 3'                |                               |         |                         |
| hsa-ADD3                     | Forward | ACCAGCTCCTCCTAACCCAT    |                               |         |                         |
|                              | Reverse | TCACTCGCTTAGCAAGCTCAT   |                               |         |                         |
| hsa-ERBB2IP                  | Forward | AGTTCCTCGTGACTGGAGAGA   |                               |         |                         |
|                              | Reverse | AATGGGTTTCTCTACCCCC     |                               |         |                         |
| hsa-KIF13A                   | Forward | GTGCAGCATTCAAGGACACT    |                               |         |                         |
|                              | Reverse | GCATCTGACCACCTCTCCCT    |                               |         |                         |
| hsa-LAIR1                    | Forward | AAACATTCGGCCTGGAGAGG    |                               |         |                         |
|                              | Reverse | CATTGTGACTGTTGTCCGACG   |                               |         |                         |
| hsa-PTPRO                    | Forward | GGAGTGTGGAGCTGGTACAT    |                               |         |                         |
|                              | Reverse | AGGCATCAAAGTCATCCAGTTG  |                               |         |                         |
| hsa-FCGR2B                   | Forward | TCACTGGGATTGCTGTAGCG    |                               |         |                         |
|                              | Reverse | GCCTCATCAGGATTAGTGGGA   |                               |         |                         |
| hsa-UTRN                     | Forward | TTGCCAAACACCCTCGACTT    |                               |         |                         |
|                              | Reverse | AACAGTTGAGGAGATTGTGAGGG |                               |         |                         |
| mmu-PTPRO                    | Forward | ATGTGGAGCTGGCAGTTTTG    |                               |         |                         |
|                              | Reverse | ACGGGGTTTGTAGTTTCTCT    |                               |         |                         |
| mmu-FGFR1OP2                 | Forward | CATGGCCAGCAAGAAAGATGAC  |                               |         |                         |
|                              | Reverse | TTTGGTCAACATGTGCTTGC    |                               |         |                         |
| mmu-REPS1                    | Forward | AGCCAGGTGAGGTAGGTTACT   |                               |         |                         |
|                              | Reverse | CTGCATGTGGATTTTGCTTGA   |                               |         |                         |

Supplementary Table 1: Primers sets utilized to determine mRNA abundance and pre-mRNA splicing events.

## Supplementary Reference

1. Gertz et.al. Distinct properties of cell-type-specific and shared transcription factor binding sites. *Mol. Cell* 52, 25-36 (2013).
